# Supplementary material for: Gut microbiome alterations in Alzheimer’s disease
Source: Springer Nature journal article supplement (doi:10.1038/s41598-017-13601-y), 2017-10-13
Supplement: MOESM1 [file 41598_2017_13601_MOESM1_ESM.pdf]

## Gut microbiome alterations in Alzheimer's disease

Nicholas M. Vogt<sup>a</sup>, Robert L. Kerby<sup>b</sup>, Kimberly A. Dill-McFarland<sup>b</sup>, Sandra J. Harding<sup>a</sup>, Andrew P. Merluzzi<sup>a</sup>, Sterling C. Johnson<sup>c,a,d</sup>, Cynthia M. Carlsson<sup>c,a,d</sup>, Sanjay Asthana<sup>c,a</sup>, Henrik Zetterberg<sup>e,f,g,h</sup>, Kaj Blennow<sup>e,f</sup>, Barbara B. Bendlin<sup>a,d,\*</sup>, and Federico E. Rey<sup>b,\*</sup>

<sup>a</sup>Wisconsin Alzheimer's Disease Research Center, University of Wisconsin School of Medicine and Public Health, 600 Highland Avenue J5/1 Mezzanine, Madison, WI 53792

<sup>b</sup>Department of Bacteriology, University of Wisconsin-Madison, 1550 Linden Drive, Madison, WI 53706

<sup>c</sup>Geriatric Research Education and Clinical Center, William S. Middleton Memorial Veterans Hospital, 2500 Overlook Terrace, Madison, WI 53705

<sup>d</sup>Wisconsin Alzheimer's Institute, University of Wisconsin School of Medicine and Public Health, WARF Building, 610 Walnut Street, 9th Floor, Suite 957, Madison, WI 53726

<sup>e</sup>Institute of Neuroscience and Physiology, Department of Psychiatry and Neurochemistry, The Sahlgrenska Academy at the University of Gothenburg, Mölndal, Sweden

<sup>f</sup>Clinical Neurochemistry Laboratory, Sahlgrenska University Hospital, Mölndal, Sweden

<sup>g</sup>Department of Molecular Neuroscience, University College London Institute of Neurology, Queen Square, London, United Kingdom

<sup>h</sup>UK Dementia Research Institute at University College London, London, United Kingdom

\*Co-corresponding authors:

Barbara Bendlin (bbb@medicine.wisc.edu)

Federico Rey (ferey@wisc.edu)

## Supplementary Information

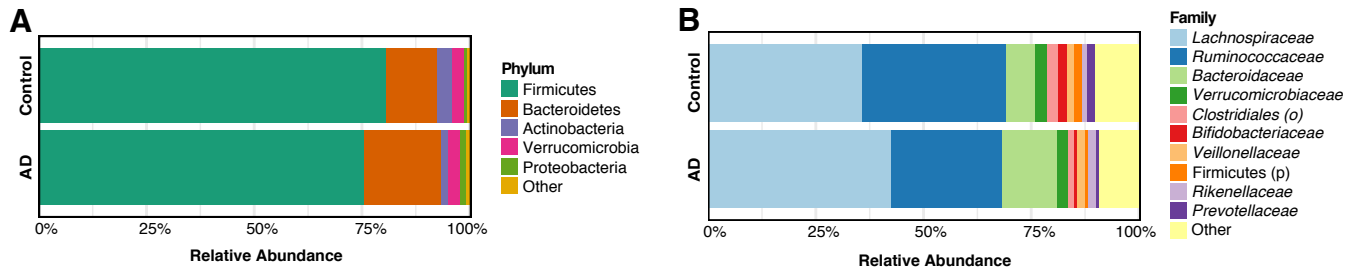

**Supplementary Figure S1.** Stacked bar plots of average relative abundance at the (A) phylum and (B) family taxonomic levels. Top 5 phyla (representing 99.3% of all sequence reads) and top 10 families (representing 90.3% of all sequence reads) are shown.

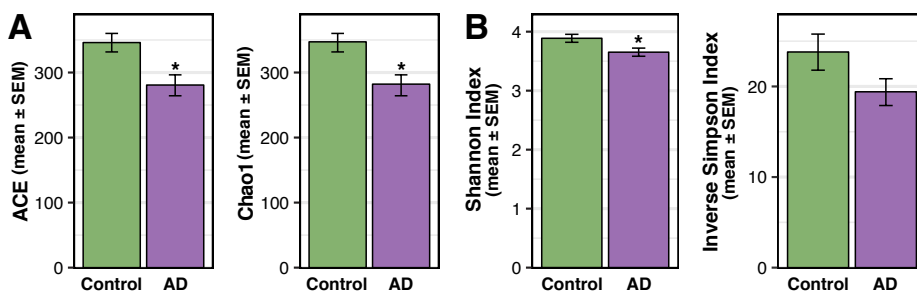

**Supplementary Figure S2.** The microbiome of AD participants has decreased (A) richness (ACE, Chao1) and (B) diversity (Shannon Index and Inverse Simpson Index) compared to Control participants. The Abundance-based Coverage Estimator (ACE) and Chao1 provide conservative estimates of microbial richness (# of unique OTUs in a sample). The Shannon Index and Inverse Simpson Index are traditional ecological diversity metrics that take into account richness and abundance of OTUs for each participant. \* $p < 0.05$ .

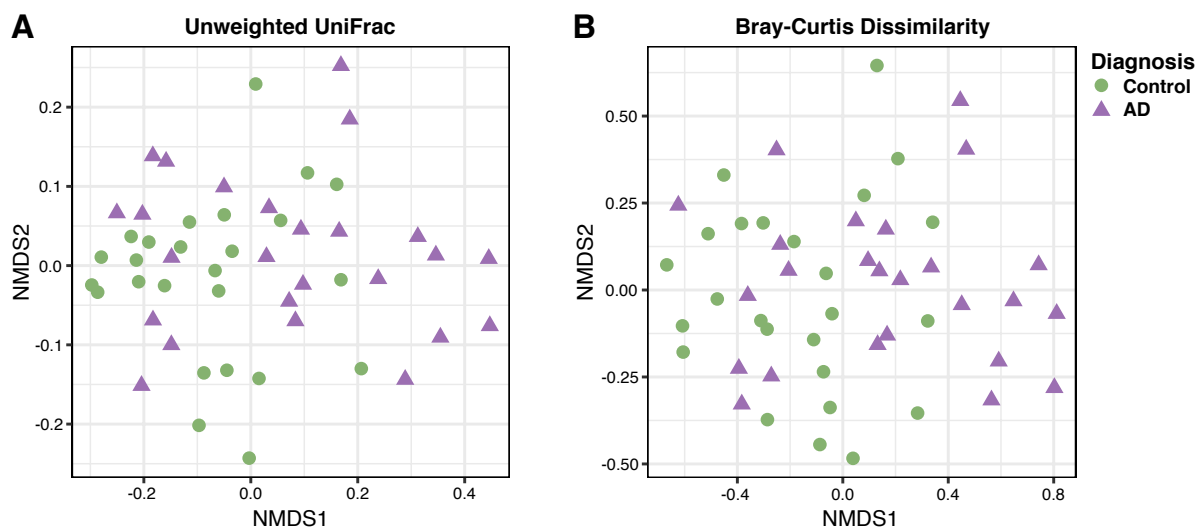

**Supplementary Figure S3.** Non-metric multidimensional scaling (NMDS) plots of (A) unweighted UniFrac and (B) Bray-Curtis dissimilarity analyses of relative sample OTU composition. NMDS analysis was limited to two dimensions, with stress measurements of 0.13 and 0.15 for unweighted UniFrac and Bray-Curtis, respectively. Each dot represents a scaled measure of the composition of a given sample, color- and shape-coded by cohort.

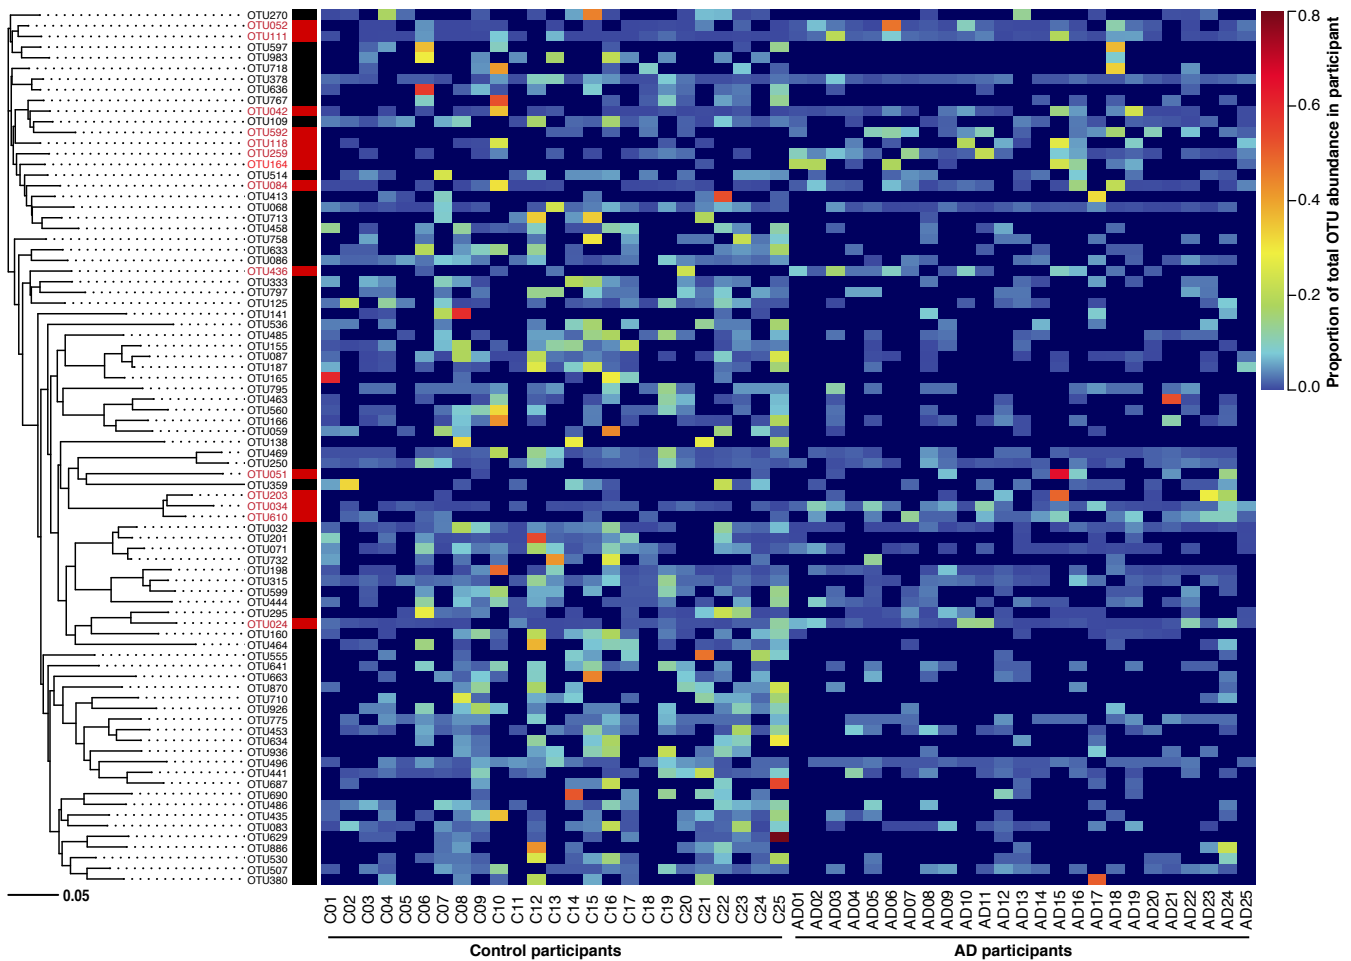

**Supplementary Figure S4.** Heat map of 82 OTUs differentially represented in AD participants. On left, 16S rRNA sequence-based neighbor-joined tree showing phylogenetic relationships of 82 OTUs identified as differentially abundant in AD participants. Red labels represent OTUs that were increased and black labels represent OTUs that were decreased in AD participants. Data shown for all 50 participants represent relative ratio of OTU abundance in a participant relative to total OTU abundance across all participants.

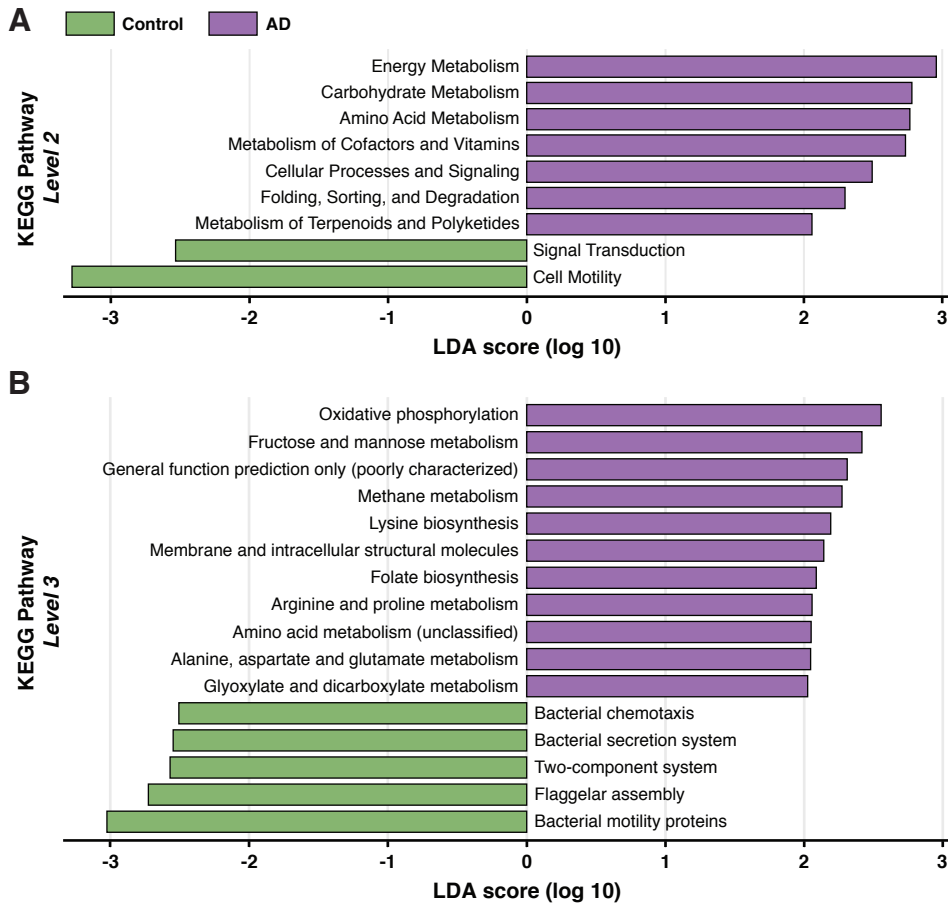

**Supplementary Figure S5.** Predicted KEGG functional pathway differences at level 2 and 3 between AD (purple) and Control (green) participants. PICRUSt was used to predict functional potential of microbiomes using 16S rRNA gene sequence data. Differentially enriched bacterial functions between groups were identified using LEfSe. Pathway differences plotted as linear discriminant analysis (LDA) scores (log 10). Bars to the right of zero represent bacterial functions enriched in the microbiome of AD participants, while bars to the left of zero represent bacterial functions enriched in the microbiome of Control participants.

**Supplementary Figure S6.** Correlations between genera relative abundance and CSF levels of YKL-40, a marker of macrophage and microglial differentiation and activation. Correlations were calculated separately for all 40 participants (All), 31 non-demented participants (ND), and 9 AD participants (AD). In AD participants, abundance of *Bacteroides* was positively correlated with CSF YKL-40 levels, while abundance of *Turicibacter* and *SMB53* were negatively correlated with CSF YKL-40 levels. Genera are ordered from most to least abundant. Shape and color of ellipses represent strength of Spearman's rank correlation coefficients (rho). Bolded ellipse borders represent significant correlations (two-sided,  $p < 0.05$  uncorrected).

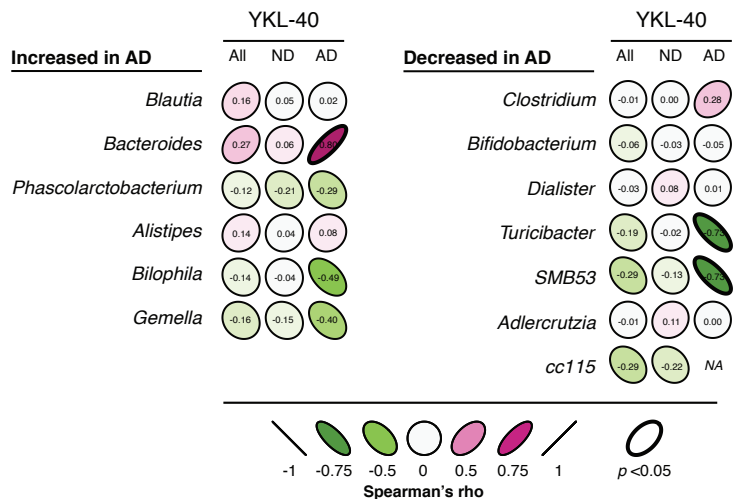

**Supplementary Table S1.** Medication use information for Control and AD participants.

| Medication use                             | Control | AD    | p value   |
|--------------------------------------------|---------|-------|-----------|
| Alzheimer's disease medication             |         |       |           |
| Donepezil/rivastigmine                     | 0/25    | 23/25 | < 0.0001* |
| Memantine                                  | 0/25    | 14/25 | < 0.0001* |
| Hypertension medication                    |         |       |           |
| ACE-inhibitor/ARB                          | 7/25    | 7/25  | 1.000     |
| Beta-blocker                               | 1/25    | 2/25  | 1.000     |
| Calcium channel blocker                    | 1/25    | 3/25  | 0.609     |
| Diuretic (thiazide)                        | 1/25    | 2/25  | 1.000     |
| Statins                                    | 7/25    | 15/25 | 0.045*    |
| Aspirin                                    | 13/25   | 13/25 | 1.000     |
| Selective serotonin reuptake inhibitors    | 1/25    | 12/25 | 0.0008*   |
| Atypical antidepressants                   | 4/25    | 7/25  | 0.496     |
| Levothyroxine                              | 5/25    | 6/25  | 1.000     |
| Proton-pump inhibitors                     | 1/25    | 7/25  | 0.0488*   |
| Metformin                                  | 2/25    | 0/25  | 0.490     |
| Gabapentin                                 | 2/25    | 2/25  | 1.000     |
| Anxiolytic (benzodiazepine)                | 2/25    | 3/25  | 1.000     |
| Antihistamine (2 <sup>nd</sup> generation) | 1/25    | 3/25  | 0.609     |
| Anticholinergic                            | 1/25    | 1/25  | 1.000     |
| Alendronate                                | 2/25    | 1/25  | 1.000     |

**Supplementary Table S2.** OTUs differentially represented in feces of AD participants compared to Control participants.

| OTU ID | Phylum          | Lowest classification      | Base Mean | Log <sub>2</sub> Fold Change (±SE) | p value<br>(FDR-corrected) |
|--------|-----------------|----------------------------|-----------|------------------------------------|----------------------------|
| OTU164 | Firmicutes      | <i>Dorea</i>               | 27.4      | 6.9 (1.4)                          | 6.78e-05                   |
| OTU051 | Verrucomicrobia | <i>Akkermansia</i>         | 122.5     | 5.2 (1.7)                          | 2.31e-02                   |
| OTU203 | Bacteroidetes   | <i>Bacteroides</i>         | 12.9      | 4.9 (1.8)                          | 4.39e-02                   |
| OTU118 | Firmicutes      | <i>Blautia</i>             | 88.8      | 4.7 (1.5)                          | 1.84e-02                   |
| OTU042 | Firmicutes      | <i>Blautia</i>             | 201.0     | 2.9 (0.8)                          | 8.71e-03                   |
| OTU436 | Firmicutes      | <i>Coprococcus</i>         | 1.9       | 2.9 (1.0)                          | 3.08e-02                   |
| OTU052 | Firmicutes      | <i>Lachnospiraceae (f)</i> | 323.1     | 2.8 (0.8)                          | 1.41e-02                   |
| OTU592 | Firmicutes      | <i>Blautia</i>             | 2.6       | 2.6 (0.7)                          | 4.09e-03                   |
| OTU610 | Bacteroidetes   | <i>Bacteroides</i>         | 5.2       | 2.4 (0.8)                          | 1.74e-02                   |
| OTU259 | Firmicutes      | <i>Clostridium</i>         | 17.2      | 2.2 (0.7)                          | 1.89e-02                   |
| OTU084 | Firmicutes      | <i>[Ruminococcus]</i>      | 113.1     | 2.2 (0.8)                          | 3.96e-02                   |
| OTU111 | Firmicutes      | <i>Clostridium</i>         | 65.3      | 2.1 (0.5)                          | 8.02e-04                   |
| OTU034 | Bacteroidetes   | <i>Bacteroides</i>         | 537.9     | 2.0 (0.7)                          | 2.91e-02                   |
| OTU024 | Firmicutes      | <i>Streptococcus</i>       | 432.2     | 1.8 (0.6)                          | 1.89e-02                   |
| OTU138 | Firmicutes      | <i>Dialister</i>           | 232.2     | -8.1 (2.2)                         | 4.56e-03                   |
| OTU059 | Firmicutes      | Firmicutes (p)             | 505.8     | -7.2 (1.5)                         | 5.95e-05                   |
| OTU201 | Firmicutes      | <i>SMB53</i>               | 95.2      | -6.8 (1.1)                         | 1.35e-07                   |
| OTU141 | Bacteria (k)    | Bacteria (k)               | 25.3      | -6.7 (2.1)                         | 1.74e-02                   |
| OTU160 | Firmicutes      | <i>Turicibacter</i>        | 173.9     | -6.3 (1.1)                         | 1.73e-06                   |
| OTU597 | Firmicutes      | <i>Dorea</i>               | 6.6       | -6.2 (1.7)                         | 4.78e-03                   |
| OTU165 | Firmicutes      | <i>Clostridium</i>         | 12.3      | -5.9 (2.2)                         | 4.77e-02                   |
| OTU270 | Firmicutes      | <i>Lachnospiraceae (f)</i> | 65.5      | -5.7 (1.2)                         | 1.46e-04                   |
| OTU636 | Firmicutes      | <i>Lachnospiraceae (f)</i> | 7.9       | -5.5 (1.1)                         | 1.97e-05                   |
| OTU713 | Firmicutes      | <i>Lachnospiraceae (f)</i> | 7.7       | -5.5 (1.9)                         | 2.93e-02                   |
| OTU087 | Firmicutes      | <i>Clostridium</i>         | 397.4     | -5.2 (1.0)                         | 1.23e-05                   |
| OTU413 | Firmicutes      | <i>Lachnospiraceae (f)</i> | 3.4       | -5.1 (1.9)                         | 4.89e-02                   |
| OTU555 | Firmicutes      | Clostridiales (o)          | 5.1       | -5.1 (1.4)                         | 6.68e-03                   |
| OTU155 | Firmicutes      | <i>Clostridium</i>         | 112.0     | -5.1 (1.0)                         | 6.78e-05                   |
| OTU380 | Firmicutes      | <i>Ruminococcaceae (f)</i> | 2.0       | -4.8 (1.6)                         | 2.53e-02                   |
| OTU732 | Firmicutes      | Clostridiales (o)          | 2.4       | -4.7 (1.0)                         | 6.78e-05                   |
| OTU634 | Firmicutes      | <i>Ruminococcus</i>        | 4.0       | -4.6 (1.3)                         | 1.04e-02                   |
| OTU710 | Firmicutes      | <i>Ruminococcaceae (f)</i> | 4.8       | -4.6 (1.2)                         | 4.83e-03                   |
| OTU633 | Firmicutes      | <i>Coprococcus</i>         | 6.2       | -4.5 (1.0)                         | 1.93e-04                   |
| OTU687 | Firmicutes      | <i>Ruminococcaceae (f)</i> | 6.8       | -4.5 (1.6)                         | 4.34e-02                   |
| OTU926 | Firmicutes      | <i>Ruminococcaceae (f)</i> | 2.3       | -4.4 (0.9)                         | 6.34e-05                   |
| OTU463 | Firmicutes      | Firmicutes (p)             | 6.8       | -4.4 (0.9)                         | 1.45e-04                   |
| OTU870 | Bacteria (k)    | Bacteria (k)               | 4.1       | -4.2 (1.2)                         | 1.04e-02                   |
| OTU458 | Firmicutes      | <i>Lachnospiraceae (f)</i> | 17.6      | -4.1 (1.1)                         | 4.75e-03                   |
| OTU071 | Firmicutes      | Clostridiales (o)          | 307.8     | -4.0 (0.7)                         | 8.19e-06                   |
| OTU886 | Firmicutes      | <i>Oscillospira</i>        | 2.4       | -4.0 (1.2)                         | 1.74e-02                   |
| OTU718 | Firmicutes      | <i>Lachnospiraceae (f)</i> | 2.2       | -3.9 (1.4)                         | 3.60e-02                   |
| OTU690 | Firmicutes      | <i>Oscillospira</i>        | 2.3       | -3.9 (1.4)                         | 4.86e-02                   |
| OTU767 | Firmicutes      | <i>Blautia</i>             | 4.6       | -3.9 (0.9)                         | 7.60e-04                   |
| OTU983 | Firmicutes      | <i>Lachnospiraceae (f)</i> | 1.8       | -3.8 (0.9)                         | 2.51e-04                   |
| OTU435 | Firmicutes      | <i>Ruminococcaceae (f)</i> | 8.6       | -3.8 (1.0)                         | 2.02e-03                   |
| OTU032 | Firmicutes      | <i>SMB53</i>               | 1015.5    | -3.7 (0.8)                         | 5.98e-05                   |
| OTU629 | Firmicutes      | <i>Oscillospira</i>        | 1.7       | -3.7 (1.0)                         | 2.96e-03                   |
| OTU187 | Firmicutes      | <i>Clostridium</i>         | 68.6      | -3.5 (1.1)                         | 1.74e-02                   |
| OTU464 | Firmicutes      | <i>c115</i>                | 22.6      | -3.5 (1.2)                         | 3.42e-02                   |
| OTU560 | Firmicutes      | Firmicutes (p)             | 8.1       | -3.5 (0.9)                         | 1.98e-03                   |
| OTU333 | Firmicutes      | <i>Lachnospiraceae (f)</i> | 34.3      | -3.4 (1.1)                         | 2.88e-02                   |

|        |                |                                |       |            |          |
|--------|----------------|--------------------------------|-------|------------|----------|
| OTU599 | Firmicutes     | <i>[Mogibacteriaceae] (f)</i>  | 6.8   | -3.3 (0.8) | 6.44e-04 |
| OTU166 | Firmicutes     | Firmicutes (p)                 | 113.6 | -3.3 (1.1) | 2.49e-02 |
| OTU109 | Firmicutes     | <i>Blautia</i>                 | 206.7 | -3.3 (0.9) | 3.18e-03 |
| OTU663 | Firmicutes     | <i>Ruminococcaceae (f)</i>     | 5.5   | -3.3 (1.1) | 2.45e-02 |
| OTU536 | Bacteria (k)   | Bacteria (k)                   | 2.8   | -3.2 (0.9) | 1.04e-02 |
| OTU083 | Firmicutes     | <i>Ruminococcaceae (f)</i>     | 347.6 | -3.2 (1.0) | 1.84e-02 |
| OTU359 | Proteobacteria | <i>Haemophilus</i>             | 10.5  | -3.1 (0.9) | 1.26e-02 |
| OTU485 | Firmicutes     | <i>Christensenellaceae (f)</i> | 10.7  | -3.1 (0.8) | 3.90e-03 |
| OTU936 | Firmicutes     | <i>Ruminococcaceae (f)</i>     | 3.0   | -3.1 (1.1) | 3.72e-02 |
| OTU486 | Firmicutes     | <i>Ruminococcaceae (f)</i>     | 10.9  | -3.1 (1.1) | 3.67e-02 |
| OTU758 | Firmicutes     | <i>Lachnospiraceae (f)</i>     | 2.5   | -2.9 (1.0) | 2.60e-02 |
| OTU295 | Firmicutes     | <i>Lactococcus</i>             | 40.6  | -2.9 (0.9) | 2.07e-02 |
| OTU530 | Firmicutes     | <i>Oscillospira</i>            | 6.9   | -2.8 (1.0) | 4.47e-02 |
| OTU125 | Firmicutes     | <i>Lachnospira</i>             | 107.0 | -2.8 (1.0) | 4.96e-02 |
| OTU641 | Firmicutes     | <i>Ruminococcaceae (f)</i>     | 4.4   | -2.7 (0.7) | 6.28e-03 |
| OTU198 | Firmicutes     | <i>[Mogibacteriaceae] (f)</i>  | 42.0  | -2.5 (0.7) | 1.00e-02 |
| OTU086 | Firmicutes     | <i>Coprococcus</i>             | 225.5 | -2.4 (0.9) | 4.39e-02 |
| OTU514 | Firmicutes     | <i>Lachnospiraceae (f)</i>     | 7.1   | -2.4 (0.8) | 3.42e-02 |
| OTU797 | Firmicutes     | <i>Lachnospiraceae (f)</i>     | 2.6   | -2.3 (0.8) | 4.28e-02 |
| OTU441 | Firmicutes     | <i>Ruminococcaceae (f)</i>     | 14.6  | -2.2 (0.8) | 3.62e-02 |
| OTU453 | Firmicutes     | <i>Ruminococcus</i>            | 9.4   | -2.0 (0.7) | 3.68e-02 |
| OTU315 | Firmicutes     | <i>[Mogibacteriaceae] (f)</i>  | 23.8  | -1.9 (0.6) | 1.53e-02 |
| OTU068 | Firmicutes     | <i>Lachnospiraceae (f)</i>     | 373.9 | -1.8 (0.7) | 4.89e-02 |
| OTU444 | Firmicutes     | Clostridiales (o)              | 7.5   | -1.8 (0.6) | 3.96e-02 |
| OTU469 | Actinobacteria | <i>Adlercreutzia</i>           | 11.7  | -1.7 (0.6) | 3.01e-02 |
| OTU775 | Firmicutes     | <i>Ruminococcus</i>            | 3.7   | -1.7 (0.5) | 1.74e-02 |
| OTU795 | Bacteria (k)   | Bacteria (k)                   | 2.7   | -1.4 (0.5) | 3.96e-02 |
| OTU250 | Actinobacteria | <i>Adlercreutzia</i>           | 21.4  | -1.4 (0.5) | 2.45e-02 |
| OTU496 | Firmicutes     | <i>Ruminococcaceae (f)</i>     | 7.0   | -1.4 (0.4) | 1.26e-02 |
| OTU507 | Firmicutes     | <i>Ruminococcaceae (f)</i>     | 5.6   | -1.4 (0.5) | 4.77e-02 |
| OTU378 | Firmicutes     | <i>Lachnospiraceae (f)</i>     | 12.4  | -1.1 (0.4) | 4.34e-02 |

**Supplementary Table S3.** Differential abundance at phylum, family, and genus level.

| Phylum                       | Total sequence reads |         | Median, range (%) |                  | p value<br>(FDR-corrected) | ↑ or ↓ in AD |
|------------------------------|----------------------|---------|-------------------|------------------|----------------------------|--------------|
|                              | Control              | AD      | Control           | AD               |                            |              |
| Bacteroidetes                | 94,050               | 139,700 | 12.0, 0.7-42.3    | 18.3, 2.3-33.9   | 0.011                      | ↑            |
| Firmicutes                   | 632,303              | 593,073 | 82.0, 53.9-93.7   | 76.5, 57.0-92.3  | 0.037                      | ↓            |
| Actinobacteria               | 26,996               | 14,469  | 2.37, 0.37-13.2   | 1.36, 0.21-6.91  | 0.049                      | ↓            |
| Family                       | Control              | AD      | Control           | AD               | p value<br>(FDR-corrected) | ↑ or ↓ in AD |
| <i>Bacteroidaceae</i>        | 52,975               | 100,536 | 6.23, 0.52-13.7   | 11.5, 1.7-23.7   | 4e-4                       | ↑            |
| <i>Rikenellaceae</i>         | 8,599                | 14,302  | 0.82, 0.01-3.61   | 1.55, 0.01-4.47  | 0.038                      | ↑            |
| <i>Gemellaceae</i>           | 18                   | 51      | 0, 0-0.01         | 0, 0-0.03        | 0.048                      | ↑            |
| <i>Ruminococcaceae</i>       | 262,710              | 202,254 | 34.5, 19.3-50.8   | 27.3, 4.7-42.6   | 0.008                      | ↓            |
| <i>Bifidobacteriaceae</i>    | 18,180               | 6,221   | 0.94, 0-12.3      | 0.25, 0-6.71     | 0.028                      | ↓            |
| <i>Clostridiaceae</i>        | 16,148               | 3,456   | 1.06, 0-9.15      | 0.10, 0-4.66     | 0.002                      | ↓            |
| <i>Mogibacteriaceae</i>      | 2,683                | 1,052   | 0.16, 0.01-2.38   | 0.09, 0.003-0.59 | 0.043                      | ↓            |
| <i>Turicibacteraceae</i>     | 1,773                | 44      | 0.06, 0-1.13      | 0, 0-0.04        | 1e-4                       | ↓            |
| <i>Peptostreptococcaceae</i> | 1,038                | 40      | 0.003, 0-2.16     | 0, 0-0.09        | 0.015                      | ↓            |
| Genus                        | Control              | AD      | Control           | AD               | p value<br>(FDR-corrected) | ↑ or ↓ in AD |
| <i>Blautia</i>               | 82,787               | 119,554 | 8.01, 1.5-30.8    | 12.9, 2.02-28.0  | 0.042                      | ↑            |
| <i>Bacteroides</i>           | 52,975               | 100,536 | 6.23, 0.52-13.7   | 11.5, 1.65-23.7  | 5e-4                       | ↑            |
| <i>Alistipes</i>             | 6,294                | 11,127  | 0.62, 0.01-2.97   | 1.13, 0-4.14     | 0.032                      | ↑            |
| <i>Phascolarctobacterium</i> | 2,823                | 8,984   | 0.11, 0-1.31      | 1.13, 0-3.00     | 5e-4                       | ↑            |
| <i>Bilophila</i>             | 781                  | 1,606   | 0.05, 0-0.26      | 0.21, 0-0.85     | 0.018                      | ↑            |
| <i>Gemella</i>               | 18                   | 51      | 0, 0-0.01         | 0, 0-0.03        | 0.049                      | ↑            |
| <i>Bifidobacterium</i>       | 18,180               | 6,221   | 0.94, 0-12.3      | 0.25, 0-6.71     | 0.025                      | ↓            |
| <i>SMB53</i>                 | 9,250                | 1,527   | 0.51, 0-5.96      | 0.02, 0-1.25     | 0.001                      | ↓            |
| <i>Dialister</i>             | 8,842                | 1,701   | 1.20, 0-2.99      | 0, 0-1.78        | 5e-4                       | ↓            |
| <i>Clostridium</i>           | 6,807                | 1,755   | 0.28, 0-3.88      | 0.003, 0-4.41    | 0.024                      | ↓            |
| <i>Turicibacter</i>          | 1,773                | 44      | 0.06, 0-1.13      | 0, 0-0.04        | 1e-4                       | ↓            |
| <i>Adlercreutzia</i>         | 478                  | 203     | 0.04, 0.003-0.24  | 0.02, 0-0.11     | 0.017                      | ↓            |
| <i>cc115</i>                 | 454                  | 45      | 0.01, 0-0.38      | 0, 0-0.07        | 1.2e-4                     | ↓            |

**Supplementary Table S4.** Participant characteristics, CSF biomarker levels, and genus relative abundance.

|                                                | All                | Non-demented (ND)  | AD                 |
|------------------------------------------------|--------------------|--------------------|--------------------|
| n                                              | 40                 | 31                 | 9                  |
| Age at fecal sample (yrs, mean ± SD)           | 69.6 ± 8.3         | 68.3 ± 8.6         | 74.0 ± 5.1         |
| Age at CSF collection (yrs, mean ± SD)         | 65.7 ± 7.8         | 64.5 ± 8.1         | 70.0 ± 4.8         |
| Sex (% Female)                                 | 73% (29/40)        | 74% (23/31)        | 67% (6/9)          |
| Ethnicity (% Caucasian)                        | 98% (39/40)        | 97% (30/31)        | 100% (9/9)         |
| BMI (kg/m <sup>2</sup> , median [IQR])         | 26.8 [24.6 – 29.4] | 26.6 [24.2 – 30.5] | 28.7 [25.7 – 29.1] |
| <b>CSF biomarkers</b>                          |                    |                    |                    |
|                                                | All                | ND                 | AD                 |
| Aβ <sub>42</sub> /Aβ <sub>40</sub> (mean ± SD) | 0.084 ± 0.020      | 0.091 ± 0.017      | 0.059 ± 0.006      |
| P-tau (pg/mL, mean ± SD)                       | 52.5 ± 27.7        | 44.1 ± 15.4        | 81.4 ± 40.5        |
| P-tau/Aβ <sub>42</sub> (mean ± SD)             | 0.100 ± 0.080      | 0.068 ± 0.039      | 0.209 ± 0.089      |
| YKL-40 (ng/mL, mean ± SD)                      | 165.8 ± 71.8       | 152.2 ± 45.5       | 212.6 ± 119.1      |
| <b>Relative Abundance (%), median [range]</b>  |                    |                    |                    |
| Genus                                          | All                | ND                 | AD                 |
| <i>Blautia</i>                                 | 9.98 [1.92-30.8]   | 8.76 [1.92-30.8]   | 16.4 [10.1-27.0]   |
| <i>Bacteroides</i>                             | 8.52 [0.56-25.9]   | 6.41 [0.56-25.9]   | 15.5 [1.65-21.4]   |
| <i>Phascolarctobacterium</i>                   | 0.46 [0-3.00]      | 0.32 [0-2.35]      | 1.60 [0-3.00]      |
| <i>Alistipes</i>                               | 0.55 [0-3.52]      | 0.54 [0-2.05]      | 0.93 [0-3.52]      |
| <i>Bilophila</i>                               | 0.07 [0-0.41]      | 0.07 [0-0.28]      | 0.17 [0-0.41]      |
| <i>Gemella</i>                                 | 0 [0-0.03]         | 0 [0-0.01]         | 0 [0-0.03]         |
| <i>Clostridium</i>                             | 0.66 [0.04-5.16]   | 0.84 [0.04-5.16]   | 0.36 [0.11-4.72]   |
| <i>Bifidobacterium</i>                         | 0.25 [0-9.29]      | 0.36 [0-9.29]      | 0.12 [0-6.71]      |
| <i>Dialister</i>                               | 0.02 [0-3.35]      | 0.68 [0-3.35]      | 0 [0-1.26]         |
| <i>Turicibacter</i>                            | 0.003 [0-0.55]     | 0.01 [0-0.55]      | 0 [0-0.04]         |
| <i>SMB53</i>                                   | 0.003 [0-1.01]     | 0.006 [0-1.01]     | 0 [0-0.06]         |
| <i>Adlercreutzia</i>                           | 0.02 [0.003-0.13]  | 0.02 [0.003-0.13]  | 0.01 [0.003-0.05]  |
| <i>cc115</i>                                   | 0 [0-0.23]         | 0.003 [0-0.23]     | 0 [0-0]            |

**Supplementary Table S5.** Statistics comparing microbial richness, diversity, and differentially abundant genera between AD participants taking selective serotonin reuptake inhibitors (SSRIs) and AD participants not taking SSRIs.

|                                               | SSRI             | No SSRI         | p value |
|-----------------------------------------------|------------------|-----------------|---------|
| n                                             | 12               | 13              | --      |
| <b>Richness</b>                               |                  |                 |         |
| ACE (mean ± SD)                               | 287 ± 75         | 275 ± 87        | 0.72    |
| Chao1 (mean ± SD)                             | 289 ± 75         | 275 ± 87        | 0.67    |
| <b>Diversity</b>                              |                  |                 |         |
| Shannon Index (mean ± SD)                     | 3.68 ± 0.34      | 3.63 ± 0.36     | 0.72    |
| Inverse Simpson Index (mean ± SD)             | 19.8 ± 6.7       | 19.1 ± 8.2      | 0.82    |
| Faith's Phylogenetic Diversity (mean ± SD)    | 10.6 ± 2.5       | 10.1 ± 2.9      | 0.70    |
| <b>Relative abundance (%), median [range]</b> |                  |                 |         |
| Genus                                         | SSRI             | No SSRI         | p value |
| <i>Blautia</i>                                | 13.4 [6.1-27.0]  | 12.9 [2.0-28.0] | 0.65    |
| <i>Bacteroides</i>                            | 13.2 [1.6-20.2]  | 9.5 [2.7-23.7]  | 0.98    |
| <i>Phascolarctobacterium</i>                  | 1.02 [0-2.46]    | 1.30 [0-3.00]   | 0.21    |
| <i>Alistipes</i>                              | 1.15 [0.01-3.69] | 0.96[0-4.14]    | 1.00    |
| <i>Bilophila</i>                              | 0.15 [0-0.41]    | 0.25 [0-0.85]   | 0.10    |
| <i>Gemella</i>                                | 0 [0-0.2]        | 0.003 [0-0.03]  | 0.65    |
| <i>Clostridium</i>                            | 0.01 [0-4.41]    | 0.003 [0-0.60]  | 0.57    |
| <i>Bifidobacterium</i>                        | 0.02 [0-1.55]    | 0.45 [0-6.71]   | 0.09    |
| <i>Dialister</i>                              | 0 [0-1.26]       | 0 [0-1.78]      | 0.47    |
| <i>Turicibacter</i>                           | 0 [0-0.02]       | 0 [0-0.04]      | 0.11    |
| <i>SMB53</i>                                  | 0.01 [0-0.83]    | 0.08 [0-1.25]   | 0.25    |
| <i>Adlercreutzia</i>                          | 0.03 [0-0.11]    | 0.02 [0-0.05]   | 0.25    |
| <i>cc115</i>                                  | 0 [0-0.05]       | 0 [0-0.07]      | 0.77    |
